# Supplementary material
Source: HighWire-hosted journal article supplement (https://svn.smart01.highwire.org/content/svn-2024-003664)
Supplement: inline-supplementary-material-1 [file inline-supplementary-material-1.pdf]

Supplementary table 1. Treatment received by enrolled patients during the follow-up period

| Variables                     | oxLDL T1<br>N=1936 | oxLDL T2<br>N=1936 | oxLDL T3<br>N=1942 | P value |
|-------------------------------|--------------------|--------------------|--------------------|---------|
| Follow-up period(90days)      |                    |                    |                    |         |
| Antihyperlipidaemic Treatment | 985(16.94)         | 993(17.08)         | 1052(18.09)        | 0.0818  |
| CEA                           | 0(0)               | 1(0.02)            | 0(0)               | 0.3672  |
| Stent implantation therapy    | 4(0.07)            | 8(0.14)            | 5(0.09)            | 0.4631  |

CEA, Carotid endarterectomy
